# Supplementary material
Source: PubMed Central journal article supplement (PMC9126690)

1. CHEF DNA Size Marker, 0.2–2.2 Mb, *S. cerevisiae* Ladder
2. CHEF DNA Size Marker, 1–3.1 Mb, *H. wingei* Ladder
3. guide A
4. guide B
5. guide C

Raw image of PFGE agarose gel after in-vitro Cas9 digestion in COLO320-DM cells. Image was cropped to remove extra white space and ladders, contrast was adjusted to make bands more visible. Corresponds to **Extended Data Figure 4f**.

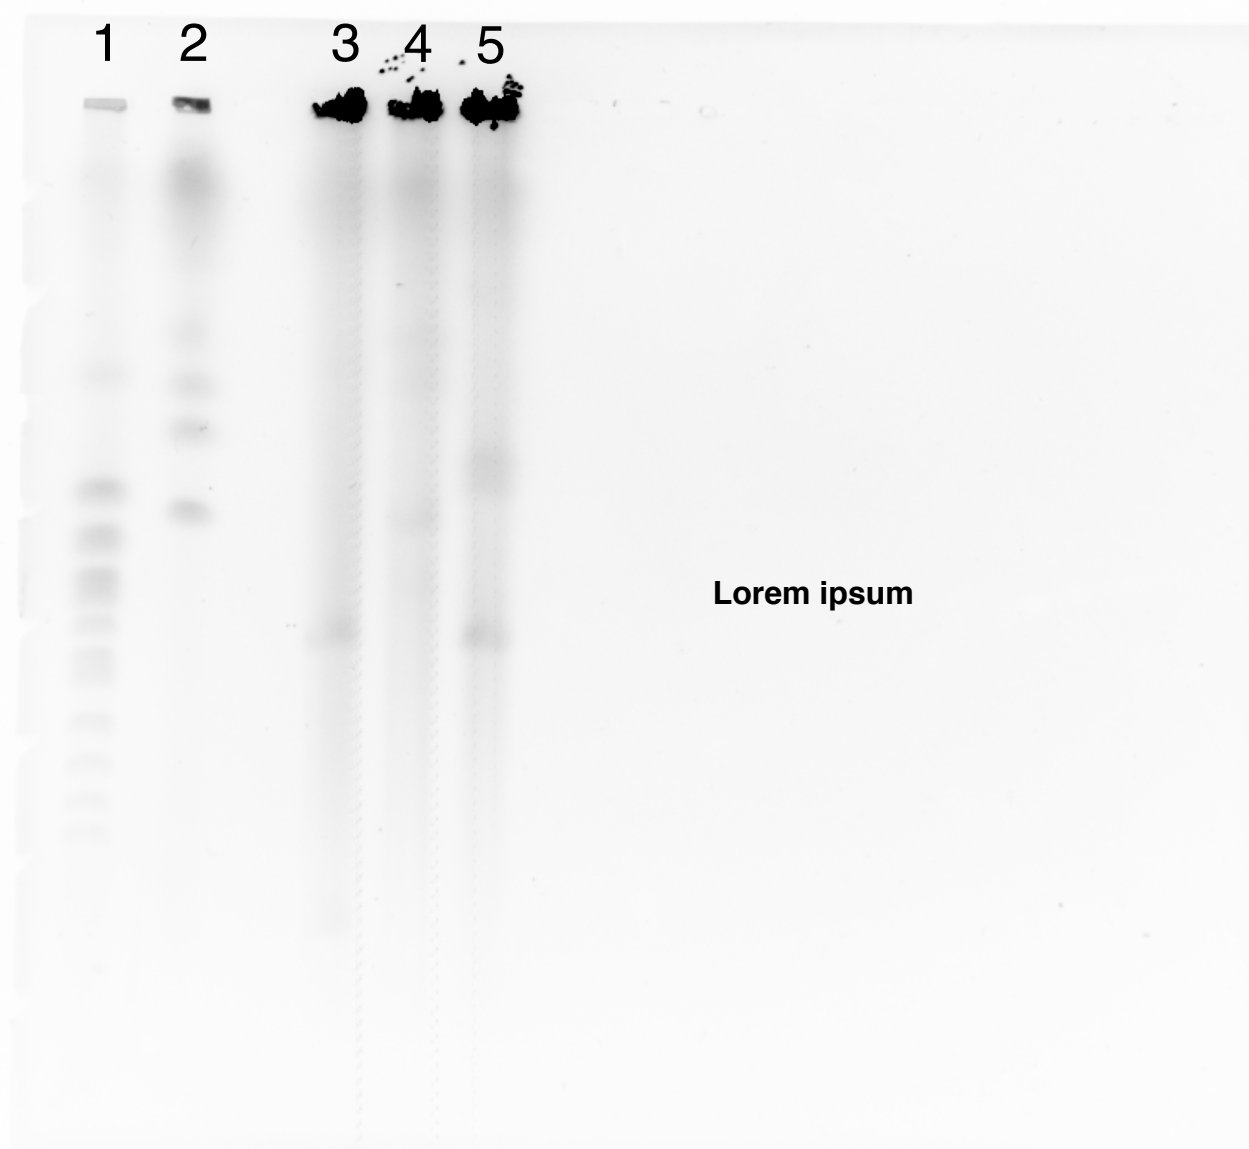

1. CHEF DNA Size Marker, 0.2–2.2 Mb, *S. cerevisiae* Ladder
2. CHEF DNA Size Marker, 1–3.1 Mb, *H. wingei* Ladder
3. guide B, *MYC* CDS

Raw image of PFGE agarose gel after in-vitro Cas9 digestion in SNU16-dCas9-KRAB cells. Image was cropped to remove extra white space, ladders and unrelated lanes. Corresponds to **Extended Data Figure 9c**.

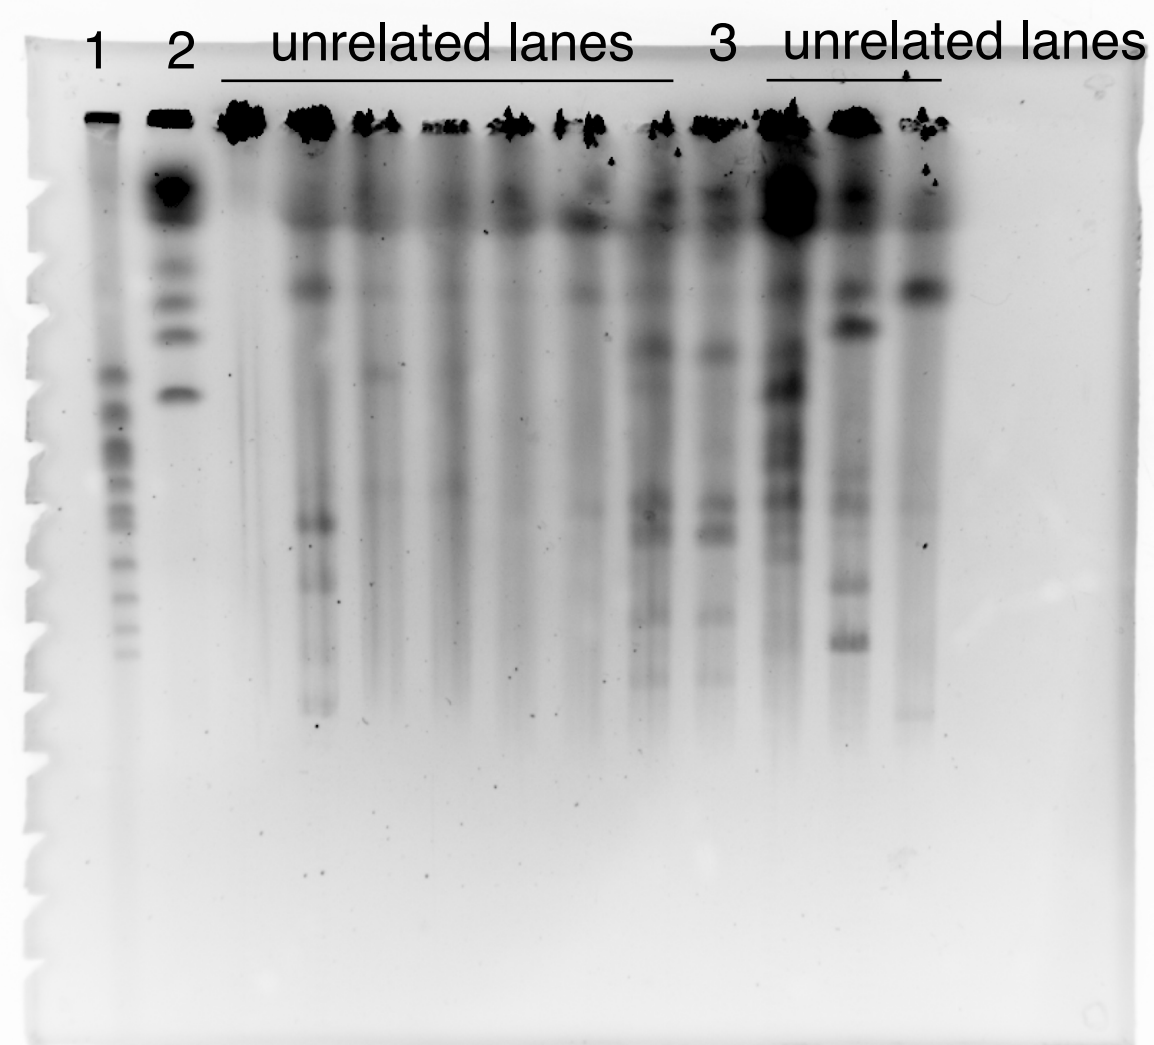

Supplement: NIHMS1802686-supplement-1802686_Sup_Fig_1.pdf [file NIHMS1802686-supplement-1802686_Sup_Fig_1.pdf]
