# Supplementary material
Source: PubMed Central journal article supplement (PMC9126690)
Supplement: NIHMS1802686-supplement-1802686_Sup_Info.pdf [file NIHMS1802686-supplement-1802686_Sup_Info.pdf]

## Supplementary Tables

### Supplementary Table 1.

| <b>primer</b>      | <b>sequence</b>         | <b>assay</b> |
|--------------------|-------------------------|--------------|
| MYC_exon1_fw       | AGGCTCTCCTTGCAGCTGCTTA  | RT_qPCR      |
| MYC_exon2_rv       | GCTAACGTTGAGGGGCATCGTC  | RT_qPCR      |
| PVT1_exon1_fw      | GAAAGGATGTTGGCGGTCCCTG  | RT_qPCR      |
| total_MYC_exon2_fw | TCCACCTCCAGCTTGTACCT    | RT_qPCR      |
| total_MYC_exon2_rv | CGTCGAGGAGAGCAGAGAAT    | RT_qPCR      |
| GAPDH_fw           | GGAGCGAGATCCCTCCAAAAT   | RT_qPCR      |
| GAPDH_rv           | GGCTGTTGTCATACTTCTCATGG | RT_qPCR      |
| 18S_fw             | TAAAGGAATTGACGGAAGGGCA  | RT_qPCR      |
| 18S_rv             | ATCTGTCAATCCTGTCCGTGTC  | RT_qPCR      |
| MYC_exon3_fw       | GGCTCCTGGCAAAGGTCA      | RT_qPCR      |
| MYC_exon3_rv       | CTGCGTAGTTGTGCTGATGT    | RT_qPCR      |
| FGFR2_fw           | GGTCGTTTCATCTGCCTGGT    | RT_qPCR      |
| FGFR2_rv           | CCTTCCCGTTTTTCAGCCAC    | RT_qPCR      |

Supplementary Table 2.

| ID | gRNA_sequence         | gRNA_info                                                  |
|----|-----------------------|------------------------------------------------------------|
| 1  | GCCTCCGGGCAGAGCGCGTG  | sgPVT1, targets PVT1 TSS in <b>Extended Data Figure 4i</b> |
| 2  | GGAATAGGGGGCTTCGCCTC  | sgMYC, targets MYC TSS in <b>Extended Data Figure 4i</b>   |
| 3  | GATGGATGGACCACAACAGGG | sgRNA1, targets enhancer in <b>Extended Data Figure 4i</b> |
| 4  | GGTTTCCTTATCTATGAACCG | sgRNA2, targets enhancer in <b>Extended Data Figure 4i</b> |
| 5  | GAGTGCATTAGAGGTACACAG | sgRNA3, targets enhancer in <b>Extended Data Figure 4i</b> |
| 6  | GATAAAAAGTGCCCGACAATG | sgRNA4, targets enhancer in <b>Extended Data Figure 4i</b> |
| 7  | GGGTTGGACTGATGACCTCAG | sgRNA5, targets enhancer in <b>Extended Data Figure 4i</b> |
| 8  | GAGGTTTGGAGACATACACAT | sgRNA6, targets enhancer in <b>Extended Data Figure 4i</b> |
| 9  | GAACGACTAGTTAGGCGTGTA | sgGal4, non-targeting guide in RNA-seq experiment          |
| 10 | GGAGAGCTTGTGGACCGAGC  | MYC ecDNA TetO insertion                                   |
| 11 | GGGATCACTAGCATGTCTG   | BRD4 HaloTag knockin                                       |
| 12 | CCAGCAATCGTTAACCACTG  | PFGE_guide_A, used in in vitro Cas9 ecDNA digestion        |
| 13 | CTTCGGGGAGACAACGACGG  | PFGE_guide_B, used in in vitro Cas9 ecDNA digestion        |
| 14 | GTCTTGCTAGACTATACCAG  | PFGE_guide_C, used in in vitro Cas9 ecDNA digestion        |
